# Supplementary material for: Discovery of Novel Lin28 Inhibitors to Suppress Cancer Cell Stemness
Source: MDPI journal article supplement (doi:10.3390/cancers14225687), 2022-11-19
Supplement: s1 [file s1]

## Supplementary Information

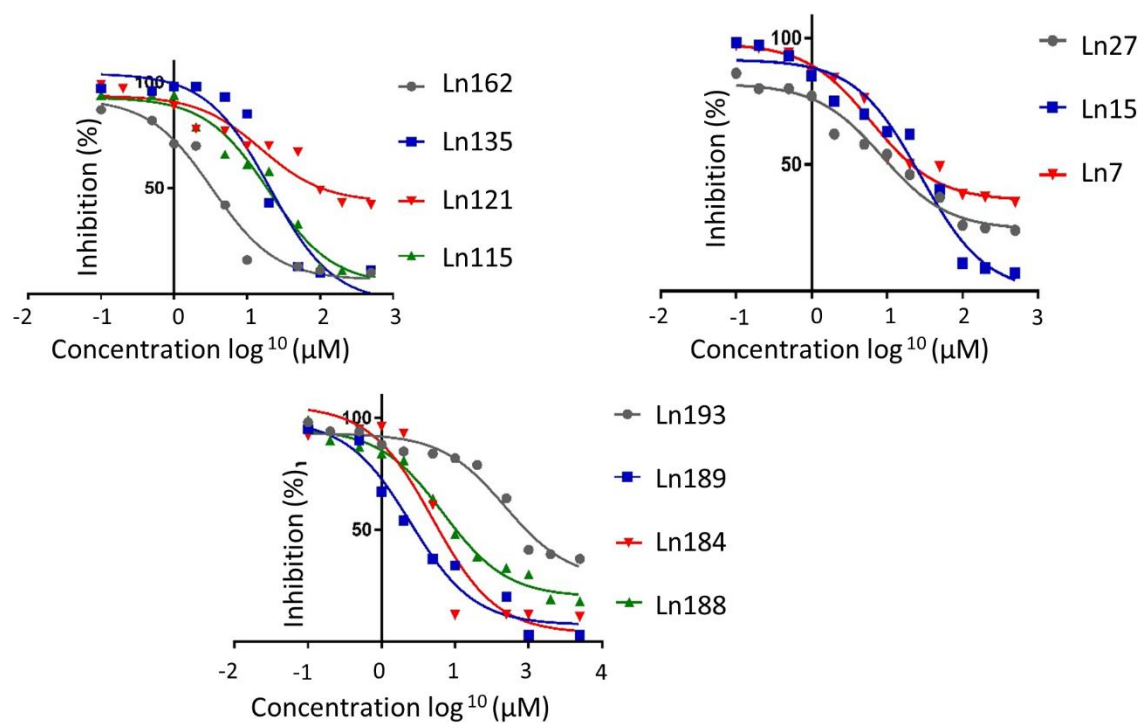

**Figure S1.** Lin28b ZKD protein was incubated with the indicated compounds at the concentration of 0, 0.1, 0.2, 0.5, 1, 2, 5, 10, 20, 50, 100, 200, or 500uM. FP signals were measured and plotted relative to that from vehicle.

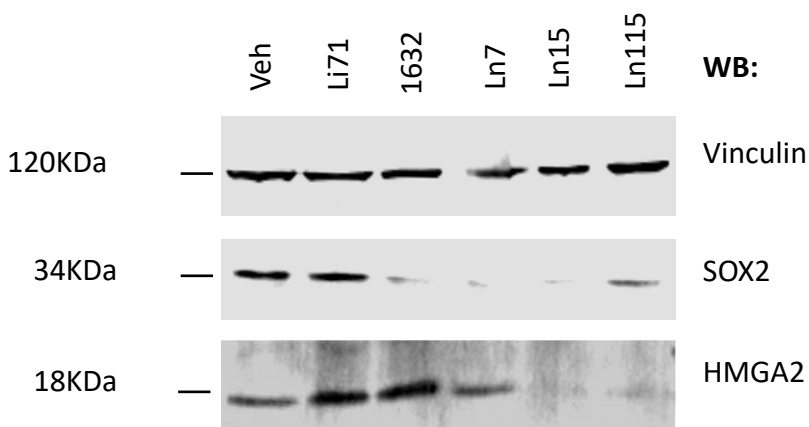

**Figure S2.** DUNE cells were treated with 20uM of indicated compounds for 24 hours. Protein lysates were collected and immunoblotted with Vinculin, SOX2, and HMGA2 antibodies.

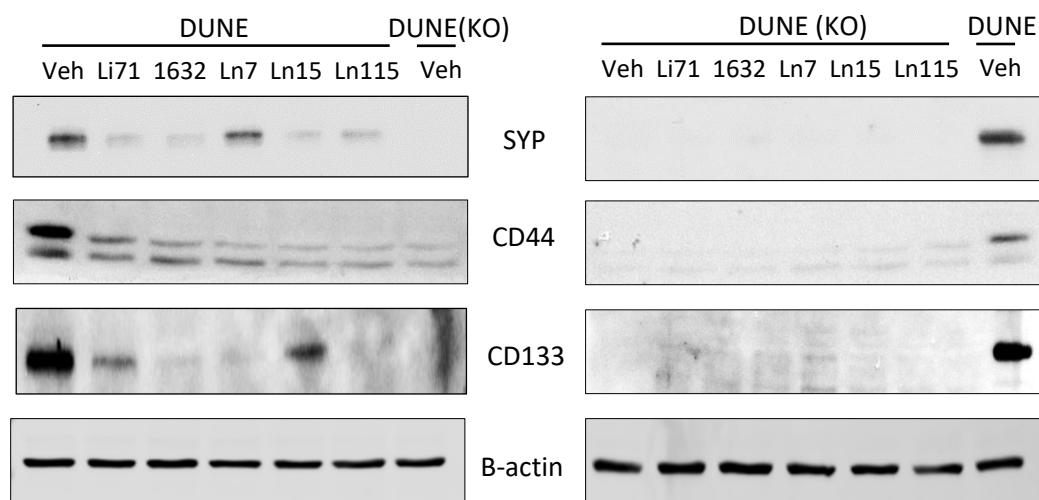

**Figure S3.** DUNE or DUNE(KO) cells were treated with 20uM of indicated compounds for 24 hours. Protein lysates were collected and immunoblotted with Lin28b, SYP, CD44, and CD133 antibodies. Beta-actin was used as the loading control.

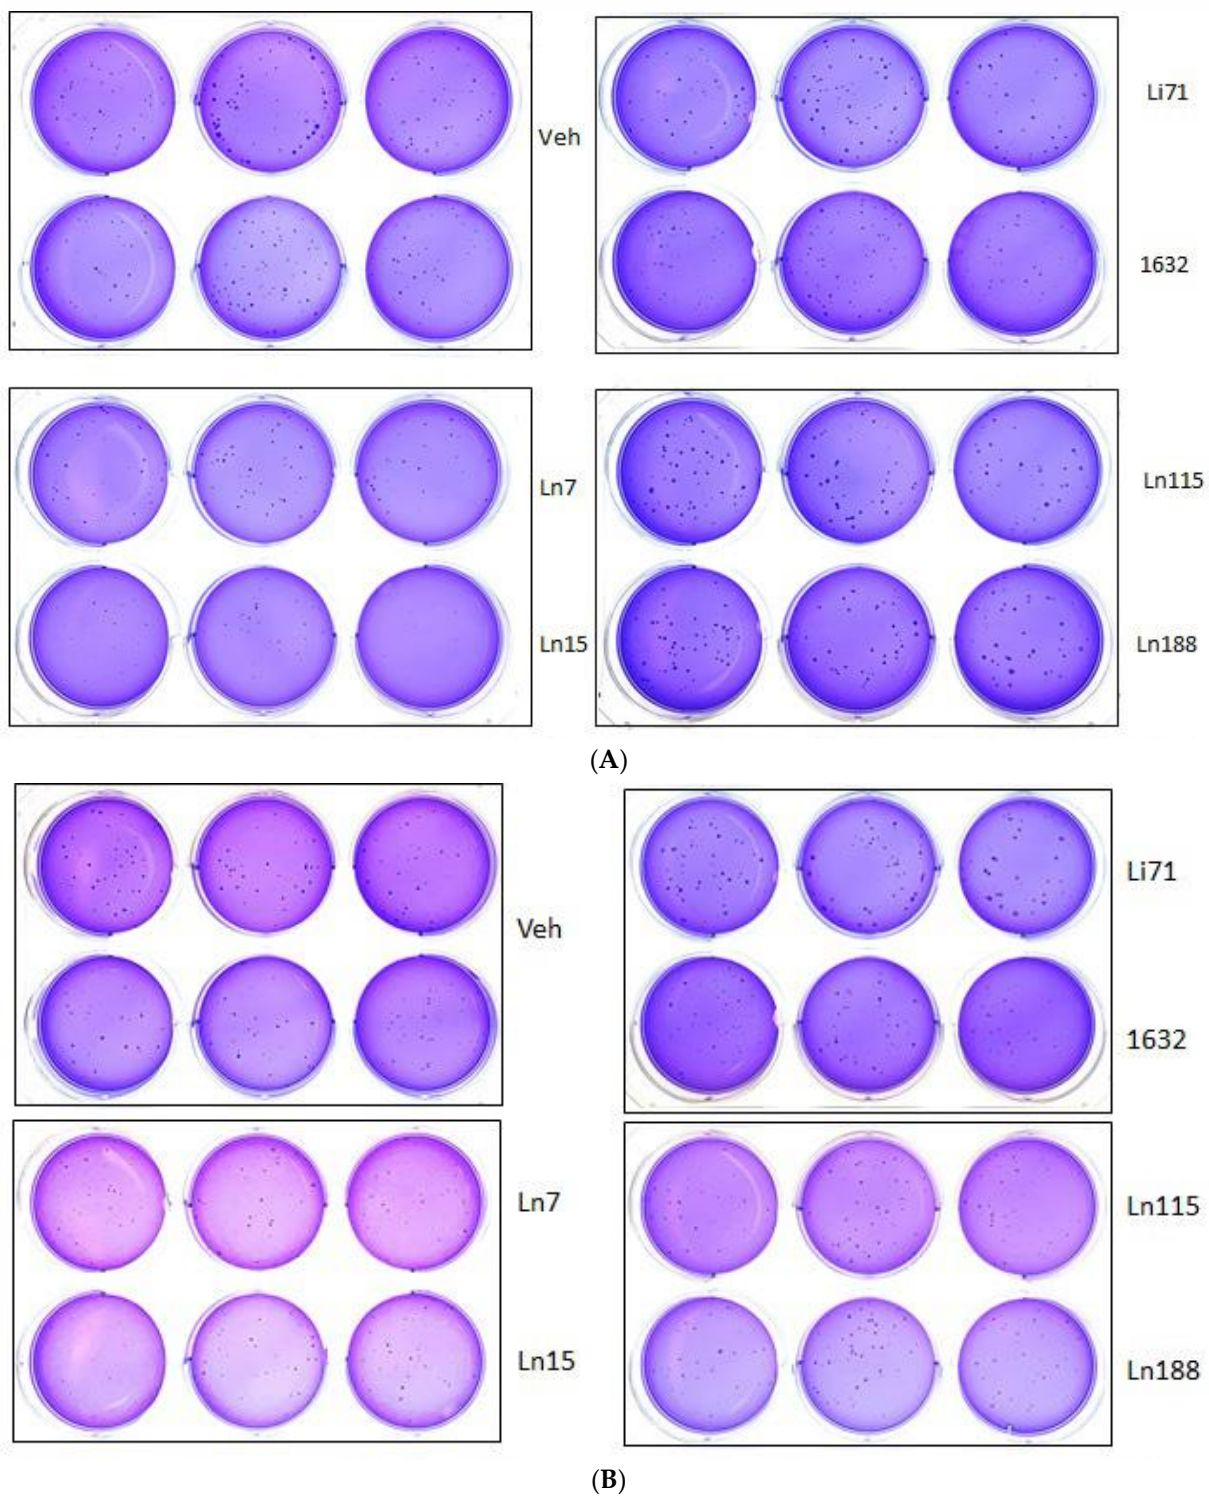

**Figure S4. A. Colony formation assays:** DUNE cells were seeded in 500 cells/well. Chemicals were added one day after cell seeding (n=3 wells/chemical). Medium with chemical at the concentration of 60uM was changed every four days for 14 days. Colonies were stained with

0.005% crystal violet staining for 2 hours. ImageJ was used to analyze colony size and numbers (circularity was set at 0.5 -1, which is equivalent to 50uM in size). Only colonies larger than 50uM were countered. **B. Colony formation assays:** DUNE(KO) cells were seeded in 500 cells/well. Chemicals were added one day after cell seeding (n=3 wells/chemical). Medium with chemical at the concentration of 60uM was changed every four days for 14 days. Colonies were stained with 0.005% crystal violet staining for 2 hours. ImageJ was used to analyze colony size and numbers (circularity was set at 0.5 -1, which is equivalent to 50uM in size). Only colonies larger than 50uM were countered.

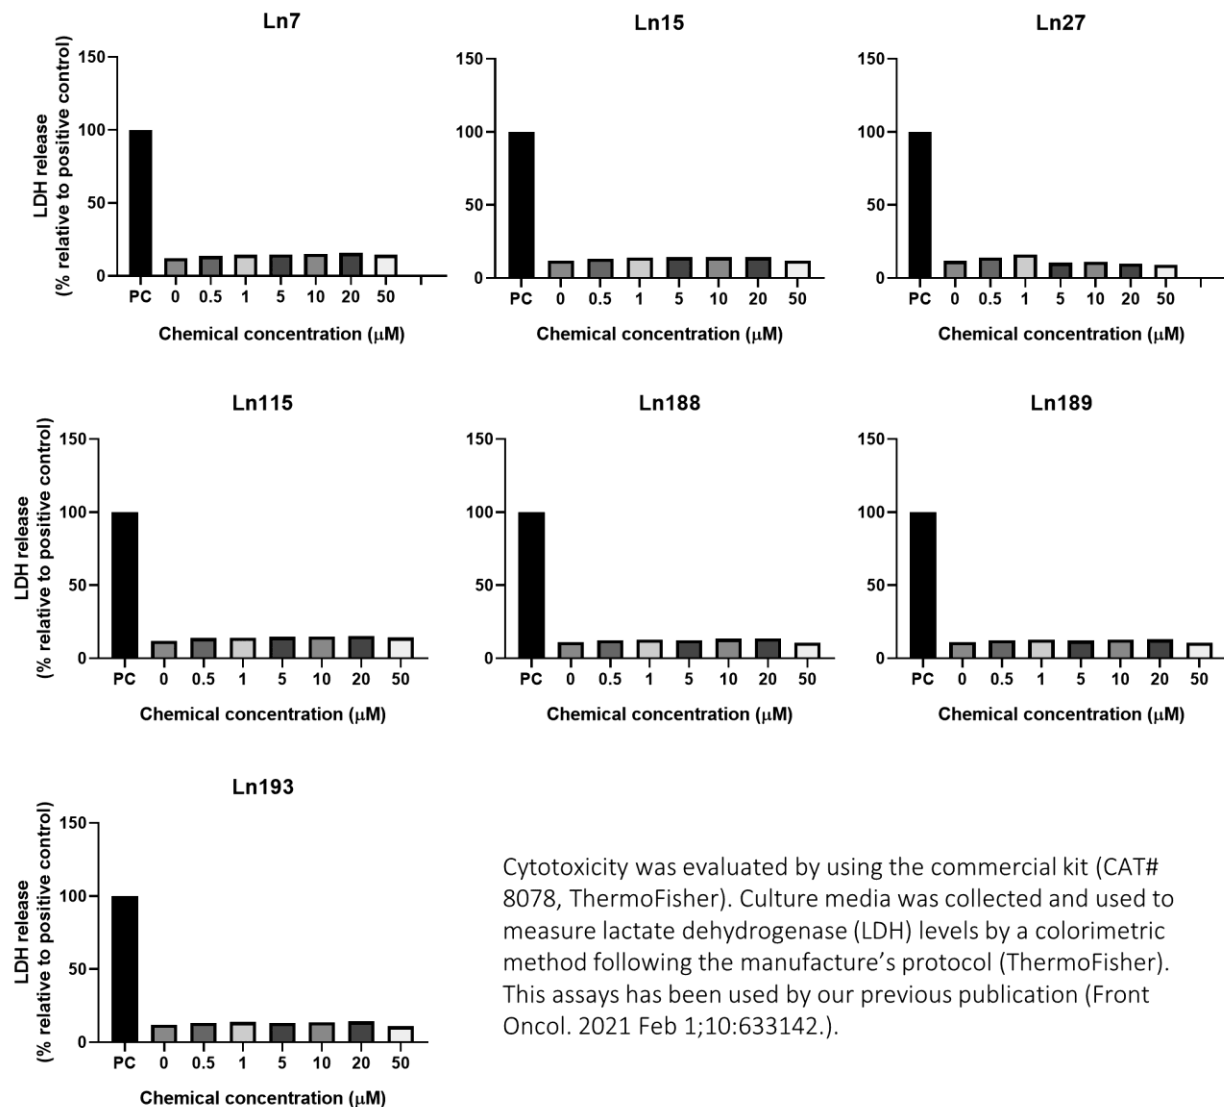

**Figure S5.** Cytotoxicity to cells by measuring lactate dehydrogenase (LDH) release.

**Table S1.** Real time-qPCR Primer Information

| Primer Name        | Forward Primer Sequence (5'-3')               | Reverse Primer Sequence (5'-3') |
|--------------------|-----------------------------------------------|---------------------------------|
| ALDH1A2            | TTGCAGGGCGTCATCAAAAC                          | ACACTCCAATGGGTTCATGTC           |
| ASCL1              | CCCAAGCAAGTCAAGCGACA                          | AAGCCGCTGAAGTTGAGCC             |
| CHGB               | CGAGGGGAAGATAGCAGTGAA                         | CAGCATGTGTTTCCGATCTGG           |
| FOXC1              | TGTTGAGTACACAGAGGATCG                         | ACAGTCGTAGACGAAAGCTCC           |
| FOXD3              | TCACGCACCAATTCTAACGC                          | CACGGCTTGCTTACTGAAGG            |
| GAPDH              | GGACCTGACCTGCCGTCTAGAA                        | GGTGTGCTGTTGAAGTCAGAG           |
| HEY1               | GTTGCGCTCTAGGTTCCATGT                         | CGTCGGCGCTTCTCAATTATTC          |
| HMGA2              | AGTCCCTCTAAAGCAGCTCAAAAG                      | GCCATTTCTAGGTCTGCCTC            |
| ID4                | GGCCACTCAAGCAGCATTTG                          | TCTGGTTGCCTGGTTAGGAC            |
| LIN28B             | TGTAGTCTACCTCCTCAGCCAA                        | ATTCTGCTTCCTGTCTTCCCTG          |
| miR-let-7d         | CCAGCTGGGAGAGGTAGTAGGTTGC                     | CTGGTGTGCTGGAGTCGGCAATT         |
| SCGN               | GGCCATTTCTGAGGCTAAACT                         | GGGCTCCTGTTTTACTAACATCA         |
| SIX2               | AAGGCACACTACATCGAGGC                          | CACGCTGCGACTCTTTTCC             |
| SOX2               | GCCGAGTGGAACCTTTTGTCG                         | GGCAGCGTGACTTATCCTTCT           |
| SYP                | TTAGTTGGGGACTACTCCTCG                         | GGCCCTTTGTTATTCTCTCGGTA         |
| SYT4               | ATGGGATACCCTACACCCAAAT                        | TCCCGAGAGAGGAATTAGAACTT         |
| U6                 | GCTTCGGCAGCACATATACTAAAAT                     | CGCTTCACGAATTTGCGTGTTCAT        |
| <b>Primer Name</b> | <b>Stem Loop Primer Sequence (5'-3')</b>      |                                 |
| miR-let-7d         | CTCAACTGGTGTGCTGGAGTCGGCAATTCAGTTGAGAACTATGC  |                                 |
| U6                 | CTCAACTGGTGTGCTGGAGTCGGCAATTCAGTTGAGAAAAATATG |                                 |

**Table S2.** Primary Antibodies List

| Antibody       | Vendor       | Catalogue Number | Application | Dilution |
|----------------|--------------|------------------|-------------|----------|
| CD44           | eBioscience  | 14-0441-82       | WB, FC, IF  | 1:500    |
| CD133          | eBioscience  | 14-1331-82       | WB, FC, IF  | 1:500    |
| $\beta$ -Actin | Santa Cruz   | sc-1615          | WB, IF      | 1:1000   |
| SOX2           | Cell signal  | 3579             | WB          | 1:1000   |
| HMGA2          | ThermoFisher | PA5-21320        | WB          | 1:1000   |
| SYP            | Santa Cruz   | Sc-17750         | WB, IF      | 1:1000   |

\*FC = Flow Cytometry

\*IF = Immunofluorescence

\*WB = Western Blot

**Table S3.** CD133 and CD44 positive cell populations in the FACS studies in figure 7 were listed.

|             | % of CD133+ cells | % CD44+ cells  |
|-------------|-------------------|----------------|
| DUNE        | 46.1 $\pm$ 5.6    | 76.6 $\pm$ 9.5 |
| DUNE(KO)    | 15.1 $\pm$ 1.3    | 12.2 $\pm$ 4.2 |
| DUNE(veh)   | 60.8 $\pm$ 6.1    | 84.7 $\pm$ 4.1 |
| DUNE(Ln7)   | 37.1 $\pm$ 4.2    | 61.6 $\pm$ 3.2 |
| DUNE(veh)   | 65.4 $\pm$ 6.8    | 91.1 $\pm$ 5.3 |
| DUNE(Ln15)  | 14.7 $\pm$ 2.1    | 70.1 $\pm$ 4.6 |
| DUNE(veh)   | 62.6 $\pm$ 8.6    | 94.9 $\pm$ 1.3 |
| DUNE(Ln115) | 30 $\pm$ 4.5      | 54.3 $\pm$ 6.0 |
